# Supplementary material for: Enhanced generation of iPSCs from older adult human cells by a synthetic five-factor self-replicative RNA
Source: PubMed Central journal article supplement (PMC5531586; doi:10.1371/journal.pone.0182018), 2017-07-27
Supplement: pone.0182018.s004.pdf [file pone.0182018.s004.pdf]

**Supporting Information Table S1. Oligonucleotides Used for Plasmid Constructs.**

| Oligo name             | Oligonucleotide Sequence                                                                     |                            |
|------------------------|----------------------------------------------------------------------------------------------|----------------------------|
| P2A Forward            | 5'-AATTCCAATTGACCGGTTCCGGAGCCACGAAC<br>TTCTCTCTGTTAAAGCAAGCAGGAGACGTGGAAG<br>AAAACCCCGGTCCTG | For P2A peptide<br>plasmid |
| P2A Reverse            | 5'-GATCCAGGACCGGGGTTTTCTTCCACGTCTCCTG<br>CTTGCTTTAACAGAGAGAAGTTCGTGGCTCCGGAAC<br>CGGTCAATTGG | For P2A peptide<br>plasmid |
| EcoR1-Mfe1-cMyc        | 5'-ggaattccaattggccaccATGCCCTCAACGTTAGCTTC                                                   | For iML plasmid            |
| BamH1-Age1-cMyc        | 5'-cgggatccaccggtCGCACAAAGAGTTCGTAGCTG                                                       | For iML plasmid            |
| EcoR1-Mfe1-Glis1       | 5'-ggaattccaattggccaccATGGCAGAGGCCCGCACATCC                                                  | For iGL, iGM plasmids      |
| BamH1-Age1-Glis1       | 5'-cgggatccaccggtGGTGTCTGTGTAGATGGAGG                                                        | For iGL, iGM plasmids      |
| BamH1-Lin28A           | 5'-cgggatccATGGGCTCCGTGTCCAACCAGCAG                                                          | For iML, iGL plasmids      |
| EcoR1-Not1-Stop-Lin28A | 5'-ggaattcgcgccgcTCAATTCTGTGCCTCCGGGAGC                                                      | For iML, iGL plasmids      |
| Xba1-BamH1-cMyc        | 5'-gctctagaggatccATGCCCTCAACGTTAGCTTCACC                                                     | For iGM plasmid            |
| EcoR1-Not1-Stop-cMyc   | 5'-ggaattcgcgccgcTCACGCACAAGAGTTCGTAGCTG                                                     | For iGM plasmid            |
